# Supplementary material for: The Prognostic Value of the Systemic Immune-Inflammation Index (SII) and Red Cell Distribution Width (RDW) in Patients with Cervical Cancer Treated Using Radiotherapy
Source: MDPI journal article supplement (doi:10.3390/cancers16081542), 2024-04-18
Supplement: s1 [file s1]

## Supplementary file

**Table S1.** The irradiation schemes of external beam radiotherapy (EBRT) used in the treatment of 249 patients receiving definitive chemoradiation therapy for cervical cancer.

| EBRT                    |     |
|-------------------------|-----|
| Dc/df + boost EBRT [Gy] | N   |
| 30/3 and 21/3*          | 1   |
| 44/2 + 10/2             | 1   |
| 45/1.8                  | 13  |
| 45/1.8 + 5.4/1.8        | 1   |
| 45/1.8 + 5.4/1.8 + 6/2  | 1   |
| 45/1.8 + 6/2            | 1   |
| 45/1.8 + 9/1.8          | 7   |
| 45/1.8 + 9/1.8 + 6/2    | 2   |
| 45/1.8 + 14.4/1.8       | 3   |
| 45/1.8 + 19.8/1.8       | 1   |
| 46/2 + 18/2             | 1   |
| 50.4/1.8                | 113 |
| 50.4/1.8 + 3.6/1.8      | 27  |
| 50.4/1.8 + 5.4/1.8      | 13  |
| 50.4/1.8 + 6/2          | 1   |
| 50.4/1.8 + 9/1.8        | 9   |
| 50.4/1.8 + 10/2         | 2   |
| 50.4/1.8 + 10.8/1.8     | 1   |
| 50/2                    | 2   |
| 54/1.8                  | 36  |
| 54/1.8 + 3.6/1.8        | 6   |
| 54/1.8 + 6/2            | 4   |
| 54/1.8 + 14.4/1.8       | 2   |

|           |                   |
|-----------|-------------------|
| 54.6/1.95 | 1                 |
|           | <b>249 (100%)</b> |

Abbreviations: EBRT – external beam radiotherapy; Dc – total dose; df – fractionation dose; N – number of patients; \*scheme of definitive EBRT in two phases.

**Table S2.** The irradiation schemes of brachytherapy (BT) used in the treatment of 246 patients receiving definitive chemoradiation therapy for cervical cancer.

| <b>BT</b>                                         |                                                                                 |                        |
|---------------------------------------------------|---------------------------------------------------------------------------------|------------------------|
| <b>Dc/df [Gy] (I phase + II phase)</b>            | <b>Prescription point (I phase + II phase)</b>                                  | <b>N</b>               |
| 5/5*                                              | Point A                                                                         | 2                      |
| 15/7.5                                            | Basal points                                                                    | 1                      |
| 20/5                                              | Point A                                                                         | 46                     |
| 20/10                                             | 1cm from probe's axis                                                           | 1                      |
| 25/5                                              | Point A                                                                         | 169                    |
| 30/5                                              | Point A                                                                         | 2                      |
| 40/5                                              | 1cm from plate's surface                                                        | 1                      |
| 40/8                                              | 1cm from plate's surface                                                        | 5                      |
| 40/10                                             | 1cm from probe's axis                                                           | 9                      |
| 50/10                                             | 1cm from probe's axis                                                           | 2                      |
| 20/5 + 14/7                                       | Point A + 0,5cm from needle's axis in all directions (interstitial-boost)       | 1                      |
| 25/5 + 14/7                                       | Point A + 0,5cm from needle's axis in all directions (interstitial-boost)       | 1                      |
| 20/10 + 15/5                                      | 1cm from probe's axis + Point A                                                 | 1                      |
| 25/5 + 30/10                                      | 0,8cm from applicator's surface (multichannel cylinder) + 1cm from probe's axis | 1                      |
| 32/8 + 30/10                                      | 1cm from plate's surface + 1cm from probe's axis                                | 2                      |
| 40/8 + 33/11                                      | 1cm from plate's surface + 1cm from probe's axis and ring's surface             | 1                      |
| 24/8 + 40/10                                      | 1cm from plate's surface + 1cm from probe's axis and ring's surface             | 1                      |
|                                                   |                                                                                 | <b>246<br/>(98.8%)</b> |
| Prescription points according to applicator type: |                                                                                 |                        |
| Point A – tandem applicator                       |                                                                                 |                        |

Basal points – interstitial implant

1cm from probe's axis – single-channel intrauterine applicator

1cm from plate's surface – individual applicator

Abbreviations: BT – brachytherapy; Dc – total dose; df – fractionation dose; N – number of patients;  
\*treatment interrupted due to the bad condition or patient's decision.
